1 **TITLE:** Antifungal activity of Propranolol against *Fusarium* keratitis isolates from the Mycotic  
2 Ulcer Treatment Trial (MUTT) and the United States.

3  
4 Ruina Bao<sup>1\*</sup>, Brandon S. Ross<sup>1\*</sup>, Cecilia G. Perez<sup>1</sup>, Galini Poimenidou<sup>1,2</sup> N. Venkatesh Prajna<sup>4</sup>,  
5 Robert A. Cramer<sup>1#</sup>, Michael E. Zegans<sup>1,3#</sup>

6  
7 <sup>1</sup>Department of Microbiology and Immunology, Geisel School of Medicine at Dartmouth,  
8 Hanover, New Hampshire, USA

9 <sup>2</sup>Department of Biology, Lawrence University, Appleton, Wisconsin, USA

10 <sup>3</sup>Department of Surgery, Section of Ophthalmology, Dartmouth-Hitchcock Medical Center,  
11 Lebanon, New Hampshire, USA

12 <sup>4</sup>Department of Cornea, Aravind Eye Hospital, Madurai, India.

13

14 Address correspondence to Michael E. Zegans, T: 603-650-5123 F: (603) 650-1728

15 [mez@dartmouth.edu](mailto:mez@dartmouth.edu)

16

17 #M.E.Z. and R.A.C. contributed equally to this study.

18 \*RB and BSR contributed equally to this study

19

20 Manuscript word count:

21

22

23

24

25

26

27 **SYNOPSIS**

28 **Background:** *Fusarium* keratitis is an infection of the cornea that often results in corneal  
29 perforation requiring corneal transplantation even with topical ocular antifungal therapy. The  
30 polyene natamycin remains the current antifungal of choice for *Fusarium* keratitis, but prompt  
31 sterilization of the cornea is often not achieved with contemporary therapy. Recently, natamycin  
32 synergy with the beta-adrenergic antagonist timolol against *Fusarium* species was reported.

33 **Objective:** Our objective in this study was to characterize the *in vitro* antifungal effects of  
34 additional beta-adrenergic antagonists alone or in combination with natamycin on *Fusarium*  
35 keratitis isolates from the Mycotic Ulcer Treatment Trial (MUTT) and USA.

36 **Methods:** Microbroth dilution assays were used to determine the minimal inhibitory  
37 concentration (MIC) of beta-adrenergic antagonists against 18 *Fusarium spp.* keratitis (10 from  
38 MUTT, 8 from USA) and 3 *Aspergillus fumigatus* isolates. The fractional inhibitory concentration  
39 index (FICI) was calculated to assess interactions with natamycin.

40 **Results:** Most beta-blockers did not show antifungal activity or synergy with natamycin with the  
41 exception of propranolol. A racemic mix of propranolol had fungicidal activity with MIC between  
42 31 and 83 µg/mL for the *Fusarium* isolates. The MIC of the less cardioactive R enantiomer was  
43 lower (27-83 µg/mL) than the MIC of the S enantiomer (42-104 µg/mL). The MICs of both  
44 propranolol and natamycin were lower in combination but were not synergistic. The MIC of  
45 propranolol was 156 µg/mL for the *A. fumigatus* isolates.

46 **Conclusions:** Propranolol has intrinsic *in vitro* fungicidal activity and lowers the MIC of  
47 natamycin. Both the R and S enantiomers of propranolol had antifungal activity with the MIC  
48 modestly but significantly lower for R-propranolol. These findings have relevance both for the  
49 treatment of fungal keratitis and of glaucoma in the setting of fungal keratitis. Further study of  
50 propranolol's antifungal activity may lead to a novel treatment for fungal keratitis and possibly  
51 other fungal infections.

52 **Trial Registration:** ClinicalTrials.gov Identifier: NCT00997035 (MUTT Trial)

53

## 54 INTRODUCTION

55 Fungal keratitis (FK), most commonly caused by the genera *Fusarium*, is a severe and often  
56 blinding infection.<sup>1,2</sup> Currently, there is only one Food and Drug Agency (FDA) approved  
57 antifungal for FK, the polyene natamycin.<sup>3</sup> The Mycotic Ulcer Treatment Trials (MUTT-I and II)  
58 explored the role of topical and/or oral voriconazole in the treatment of fungal keratitis.<sup>4,5</sup> MUTT-  
59 I was halted due to excess perforations and corneal transplantation requirements in the  
60 voriconazole-treated group. MUTT-II was unable to show a statistically significant value of  
61 adjunctive oral voriconazole compared to placebo in a group of more severe ulcers. Thus,  
62 voriconazole did not have advantages over natamycin and there remains a need for novel  
63 antifungal strategies to treat fungal keratitis. Equally important, both studies found a high rate of  
64 persistently positive cultures at 6 days leading to high rates of corneal perforation and  
65 transplantation (16% in MUTT-I and 51% in MUTT-II).<sup>4-7</sup> Cultures of the excised corneal buttons  
66 from transplantation cases in MUTT-II were positive for fungi in 67% (45/67) of cases.<sup>8</sup> Taken  
67 together these data indicate that there is often a failure to obtain a microbiologic cure of the  
68 cornea even with natamycin and oral voriconazole treatments, and this persistence of cultivable  
69 fungi in the face of treatment is associated with poor clinical outcomes.

70 We recently reported that the beta-adrenergic antagonist (a.k.a. beta blocker) timolol has  
71 synergistic antifungal activity with natamycin against filamentous fungi at concentrations  
72 comparable to those used for the treatment of glaucoma.<sup>9</sup> However, timolol did not have intrinsic  
73 antifungal activity as a single agent. In this study we describe our discovery that propranolol has  
74 intrinsic fungicidal activity against *Fusarium* species keratitis isolates at concentrations  
75 achievable in the cornea.

76

## 77 MATERIALS AND METHODS

### 78 Strains and Culture Conditions

79 *Fusarium solani* strains 06-0110, 06-0111, 06-0133, 06-330, and 06-0487 were obtained from  
80 the University of California at San Francisco-Proctor Foundation, DUMC 132.02 is from Duke  
81 University Medical Center (gift of Dr. Wiley Schell). *Fusarium oxysporum* strains 06-0197 and  
82 06-0342 were also gifts from UCSF. Ten *Fusarium solani* keratitis isolates from the Mycotic  
83 Ulcer Treatment Trial (MUTT) were randomly selected using random.org. Frozen glycerol stocks  
84 of microconidia were streaked onto potato dextrose agar (PDA; Becton, Dickinson, Franklin  
85 Lakes, NJ) and incubated for 72 hours at 30°C in atmospheric conditions. An agar plug  
86 containing hyphae was used to inoculate 100mL of potato dextrose broth (PDB; Becton,  
87 Dickinson) in a baffled culture flask. Shaking cultures were grown at 30 °C for 72 hours at 200  
88 rpm. Microconidia were harvested by filtering liquid cultures through a sterile funnel lined with  
89 Miracloth. Filtrates were centrifuged at 5000 rpm for 5 min at 4°C, decanted and washed with  
90 phosphate buffered saline (PBS; Corning, Mediatech Inc., Manassas, VA). Conidia were  
91 counted using a hemocytometer and the inoculum was resuspended in RPMI 1640 (Gibco  
92 RPMI 1640 Medium #11875176 ThermoFisher Scientific, Grand Island, NY) at  $1 \times 10^5$   
93 conidia/mL.

#### 94 ***In vitro* antifungal activity of beta-blockers**

95 Compounds R-, R/S- and S- propranolol hydrochloride (Sigma-Aldrich, St. Louis, MO) or nadolol  
96 (Sigma-Aldrich), R/S-atenolol, and sotalol hydrochloride (Tocris Bioscience, Minneapolis, MN)  
97 were dissolved in RPMI 1640 to a stock concentration of 1 mg/mL or 5mg/ml, respectively. 100  
98  $\mu$ L of the stock was added to the first well on a 96 well plate and serial 2-fold dilutions with RPMI  
99 were used to fill each row. 100  $\mu$ L of conidial suspension were added to each well and plates  
100 were incubated at 30 °C for 72 hours at atmospheric conditions, or at 37°C for 24-48 hours at  
101 5% CO<sub>2</sub> for *A. fumigatus* strains. The minimum inhibitory concentration (MIC) was determined  
102 by viewing individual wells under the light microscope and set for the drug concentration which  
103 had minimal to no germination of the microconidia.

104 Stock solutions of natamycin (10 mg/mL, Sigma-Aldrich, St. Louis, MO) were solubilized in  
105 DMSO. Serial dilutions were prepared by dissolving this stock solution into RPMI-1640 media.  
106 In the checkerboard assay, 50  $\mu$ L of RPMI + natamycin was added to each well of row A in a 96  
107 well plate. 50  $\mu$ L of RPMI + propranolol was added to each well of column A. 50  $\mu$ L of  
108 decreasing two-fold dilutions were added either from top to bottom (natamycin) or left to right  
109 (propranolol). The last solution of each dilution series was 0  $\mu$ g/mL. *Fusarium* microconidia were  
110 diluted to a concentration of  $1 \times 10^5$  conidia/mL in 10 mL of RPMI-1640, and 100  $\mu$ L of the  
111 inoculum was added to each well. The fractional inhibitory concentration index (FICI) of the  
112 combination was determined for each isolate according to previously published methods.<sup>9</sup>

113

## 114 RESULTS

115 Propranolol was observed to have antifungal activity against *Fusarium* and *Aspergillus* isolates  
116 (Table 1). At the MIC, all three formulations inhibited *Fusarium* microconidia germination *in vitro*  
117 as observed under DIC microscopy (Figure 1A-B). Similar findings were observed in *A.*  
118 *fumigatus* isolates, but the MICs were two-fold higher at 156  $\mu$ g/ml (Table 1). When  
119 microconidia treated with MIC concentrations of drug were plated onto PDA, no fungal growth  
120 was detected after incubation at 30 °C for 72 hours for all 18 *Fusarium* isolates, in contrast to  
121 the robust growth observed in untreated conidia (Figure 1C-D). These data suggest propranolol  
122 has fungicidal activity against *Fusarium* microconidia. Natamycin decreased the MIC of  
123 propranolol in 16 of 18 (89%) of isolates with 11 of 18 showing more than a twofold reduction  
124 (Table S1). The fractional inhibitory concentration indices (FICI) were all  $\geq 0.5$  denoting an  
125 indifferent interaction between natamycin and propranolol, though the MIC of both compounds  
126 was reduced in combination.<sup>10</sup>

127

## 128 DISCUSSION

129 Our data suggest that propranolol has *in vitro* fungicidal activity against *Fusarium* species  
130 microconidia across a spectrum of corneal isolates from the MUTT study and from the USA.  
131 Similar to natamycin, most *Fusarium spp.* isolates in this study had an R propranolol MIC which  
132 was  $\leq 50$   $\mu\text{g/mL}$  (Table 1). Furthermore, both the MIC of natamycin and propranolol were  
133 reduced when used in combination (Table S1). Though it did not achieve an FICI  $< 0.5$ , the  
134 criteria for a synergistic drug interaction, a reduction in the MIC of natamycin is likely still of  
135 clinical relevance given that natamycin alone often fails to clear fungi from the cornea.  
136 Importantly, both enantiomers of propranolol had similar effects, suggesting use of the less  
137 cardio-active R enantiomer might allow increased dosing and therefore achieve higher drug  
138 levels in the cornea. The fact that both enantiomers are active as well as our inability to find *in*  
139 *silico* evidence of fungal beta-adrenergic receptors suggests that propranolol's antifungal effects  
140 are not linked to the three canonical beta-receptors.<sup>11</sup> Lastly, topical beta-blockers, including  
141 propranolol, have been safely used on the ocular surface at concentrations predicted to achieve  
142 an antifungal effect in the cornea furthers the clinical significance of this finding.<sup>12</sup> Additional  
143 work to elucidate the mechanism of action of propranolol's antifungal activity may reveal related  
144 compounds with even more potent antifungal activity or novel antifungal drug targets. This may  
145 prove to also have relevance for systemic infection with other filamentous fungi.

146

## 147 **FUNDING**

148 This work was supported by the National Institutes of Health (R21 EY02877-01 to M.E.Z.; T32  
149 HL134598-03 to B.S.R.) This work was also supported by the Cystic Fibrosis Foundation RDP  
150 and the bioMT Core at Dartmouth College through the National Institute of General Medical  
151 Sciences at the National Institutes of Health (P20 GM113132). M.E.Z holds the Francis A. L'  
152 Esperance, Jr., MD, Visual Sciences Scholarship from the Geisel School of Medicine at  
153 Dartmouth.

154 **TRANSPARENCY DECLARATIONS**

155 None to declare

156

157

158

159

160

161

162

163

164

165

166

167

168

169

170

171

172

173

174 **FIGURES AND TABLES**

175 **Figure 1: Representative images of fungal growth viewed under differential interference**  
176 **contrast microscopy.** A) *Fusarium solani* 06-0110 microconidial germination was inhibited with  
177 63 µg/mL of propranolol dissolved in RPMI with L-glutamine and sodium bicarbonate after  
178 incubation at 30 °C for 72 hours in atmospheric conditions. B) DIC image of the untreated  
179 positive control shows abundant mycelial growth. C) Representative images of keratitis isolates  
180 from American and Indian patients show growth after contents of wells from plates used for the  
181 CLSI microbroth dilution method of determining minimum inhibitory concentrations. 06-0110  
182 *Fusarium solani* is shown here. Wells containing the MIC concentrations of propranolol (31-63  
183 µg/mL) exhibited no growth when plated. D) The untreated, positive control wells exhibited  
184 robust growth after incubating for 72 hours at 30 °C in atmospheric conditions. Three biological  
185 replicates were performed for each isolate.

186

187

188

189

190

191

192

193

194

195

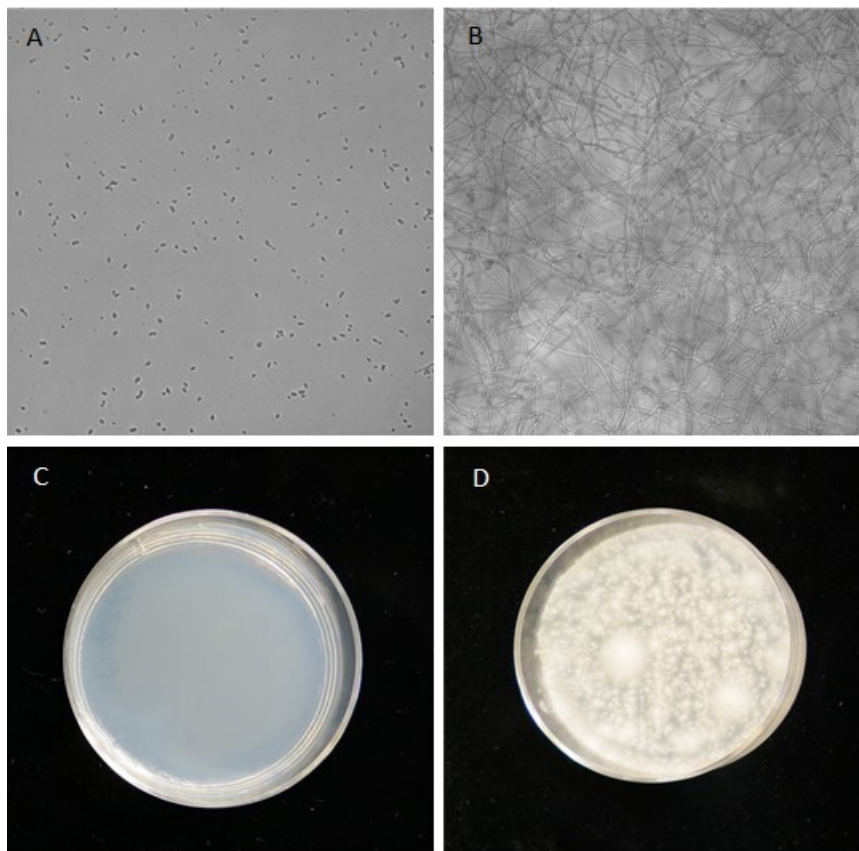



196 **Table 1: Propranolol has antifungal activity against *Fusarium* keratitis isolates as well as**  
 197 ***Aspergillus* isolates.**

| Isolate                          | Natamycin<br>MIC <sup>a,b</sup><br>(µg/mL) | R-<br>propranolol<br>MIC <sup>a,b</sup><br>(µg/mL) | S-<br>propranolol<br>MIC <sup>a,b</sup><br>(µg/mL) | R/S-<br>propranolol<br>MIC <sup>a,b</sup><br>(µg/mL) | Sotalol<br>MIC <sup>a,c</sup><br>(µg/mL) | Nadolol<br>MIC <sup>a,c</sup><br>(µg/mL) | Atenolol<br>MIC <sup>a,c</sup><br>(µg/mL) |
|----------------------------------|--------------------------------------------|----------------------------------------------------|----------------------------------------------------|------------------------------------------------------|------------------------------------------|------------------------------------------|-------------------------------------------|
| MUTT1090Z                        | 8                                          | 83                                                 | 104                                                | 83                                                   | -                                        | -                                        | -                                         |
| MUTT1121U                        | 16                                         | 52                                                 | 52                                                 | 31                                                   | -                                        | -                                        | -                                         |
| MUTT1146N                        | 32                                         | 52                                                 | 52                                                 | 63                                                   | -                                        | -                                        | -                                         |
| MUTT1170W                        | 21                                         | 27                                                 | 42                                                 | 42                                                   | -                                        | -                                        | -                                         |
| MUTT1584Q                        | 32                                         | 52                                                 | 63                                                 | 52                                                   | -                                        | -                                        | -                                         |
| MUTT1587W                        | 32                                         | 47                                                 | 42                                                 | 42                                                   | -                                        | -                                        | -                                         |
| MUTT1736Z                        | 16                                         | 31                                                 | 42                                                 | 42                                                   | -                                        | -                                        | -                                         |
| MUTT1753Z                        | 16                                         | 31                                                 | 42                                                 | 31                                                   | -                                        | -                                        | -                                         |
| MUTT2725Z                        | 16                                         | 42                                                 | 63                                                 | 52                                                   | -                                        | -                                        | -                                         |
| MUTT2226R                        | 27                                         | 47                                                 | 52                                                 | 52                                                   | -                                        | -                                        | -                                         |
| USA06-0110                       | 27                                         | 42                                                 | 52                                                 | 52                                                   | -                                        | -                                        | -                                         |
| USA06-0111                       | 21                                         | 26                                                 | 52                                                 | 42                                                   | >2500                                    | >2500                                    | >2500                                     |
| USA06-0133                       | 27                                         | 26                                                 | 52                                                 | 31                                                   | >2500                                    | >2500                                    | >2500                                     |
| USA06-0197                       | 16                                         | 42                                                 | 52                                                 | 52                                                   | -                                        | -                                        | -                                         |
| USA06-0342                       | 27                                         | 42                                                 | 63                                                 | 52                                                   | -                                        | -                                        | -                                         |
| USA06-0330                       | 27                                         | 26                                                 | 52                                                 | 42                                                   | >2500                                    | >2500                                    | >2500                                     |
| USA06-0487                       | 21                                         | 52                                                 | 63                                                 | 31                                                   | >2500                                    | >2500                                    | >2500                                     |
| USA132.02                        | 11                                         | 31                                                 | 73                                                 | 73                                                   |                                          |                                          |                                           |
| Mean (SD)                        | 22 (7)                                     | 43 (10)                                            | 54 (9)                                             | 48 (11)                                              | >2500<br>(0)                             | >2500<br>(0)                             | >2500<br>(0)                              |
| -                                |                                            |                                                    |                                                    |                                                      |                                          |                                          |                                           |
| CEA10 ( <i>A. fumigatus</i> )    | 48                                         | -                                                  | -                                                  | 156                                                  | >2500                                    | >2500                                    | >2500                                     |
| AF293 ( <i>A. fumigatus</i> )    | 48                                         | -                                                  | -                                                  | 156                                                  | >2500                                    | >2500                                    | >2500                                     |
| IFISW-F4 ( <i>A. fumigatus</i> ) | 48                                         | -                                                  | -                                                  | 156                                                  | >2500                                    | >2500                                    | >2500                                     |
| Mean (SD)                        | 48 (0)                                     | -                                                  | -                                                  | 156 (0)                                              | >2500<br>(0)                             | >2500<br>(0)                             | >2500<br>(0)                              |

198 Abbreviations: MIC = minimum inhibitory concentration

199 <sup>a</sup> MICs rounded to whole numbers

200 <sup>b</sup> Average of data from three biological replicates

201 <sup>c</sup> Average of data from two biological replicates

202 **Table S1. R-propranolol and natamycin have additive to indifferent interactive effects**  
203 **against *Fusarium* keratitis isolates.**

| <b>Isolate</b> | <b>Natamycin<br/>MIC<sup>a</sup><br/>(<math>\mu\text{g}/\text{mL}</math>)</b> | <b>R-Propranolol<br/>MIC<sup>a</sup> (<math>\mu\text{g}/\text{mL}</math>)</b> | <b>Natamycin<br/>Combination<br/>MIC<sup>a</sup> (<math>\mu\text{g}/\text{mL}</math>)</b> | <b>R-Propranolol<br/>Combination<br/>MIC<sup>a</sup><br/>(<math>\mu\text{g}/\text{mL}</math>)</b> | <b>FICI<sup>b</sup></b> |
|----------------|-------------------------------------------------------------------------------|-------------------------------------------------------------------------------|-------------------------------------------------------------------------------------------|---------------------------------------------------------------------------------------------------|-------------------------|
| MUTT1090Z      | 8                                                                             | 125                                                                           | 4                                                                                         | 63                                                                                                | 1                       |
| MUTT1121U      | 16                                                                            | 31                                                                            | 8                                                                                         | 4                                                                                                 | 0.63                    |
| MUTT1146N      | 16                                                                            | 63                                                                            | 8                                                                                         | 8                                                                                                 | 0.63                    |
| MUTT1170W      | 32                                                                            | 31                                                                            | 16                                                                                        | 8                                                                                                 | 0.75                    |
| MUTT1584Q      | 32                                                                            | 31                                                                            | 8                                                                                         | 8                                                                                                 | 0.50                    |
| MUTT1587W      | 16                                                                            | 31                                                                            | 8                                                                                         | 4                                                                                                 | 0.63                    |
| MUTT1736Z      | 8                                                                             | 31                                                                            | 8                                                                                         | 4                                                                                                 | 0.63                    |
| MUTT1753Z      | 16                                                                            | 31                                                                            | 8                                                                                         | 4                                                                                                 | 0.63                    |
| MUTT2725Z      | 16                                                                            | 31                                                                            | 8                                                                                         | 8                                                                                                 | 0.75                    |
| MUTT2226R      | 16                                                                            | 31                                                                            | 8                                                                                         | 4                                                                                                 | 0.63                    |
| USA06-0110     | 32                                                                            | 31                                                                            | 4                                                                                         | 16                                                                                                | 0.63                    |
| USA06-0111     | 16                                                                            | 16                                                                            | 8                                                                                         | 8                                                                                                 | 1                       |
| USA06-0133     | 16                                                                            | 16                                                                            | 8                                                                                         | 8                                                                                                 | 1                       |
| USA06-0197     | 16                                                                            | 31                                                                            | 8                                                                                         | 16                                                                                                | 1                       |
| USA06-0330     | 16                                                                            | 16                                                                            | 8                                                                                         | 8                                                                                                 | 1                       |
| USA06-0342     | 32                                                                            | 31                                                                            | 4                                                                                         | 16                                                                                                | 0.63                    |
| USA06-0487     | 16                                                                            | 31                                                                            | 4                                                                                         | 16                                                                                                | 0.75                    |
| USA132.02      | 8                                                                             | 31                                                                            | 8                                                                                         | 31                                                                                                | 2                       |

204 Abbreviations: MIC = minimum inhibitory concentration, FICI = fractional inhibitory concentration  
205 index

206 <sup>a</sup> MICs rounded to whole numbers.

207 <sup>b</sup> Values represent the average of data from 3 biological replicates, performed in one  
208 representative assay (<0.5 indicates synergistic interaction).

209

210

211

212

213

214

215 **REFERENCES**

- 216 **1.** Keay LJ, Gower EW, Iovieno A, et al. Clinical and Microbiological Characteristics of Fungal  
217 Keratitis in the United States, 2001–2007: A Multicenter Study. *Ophthalmology*.  
218 2011;118(5):920-926. doi:10.1016/j.ophtha.2010.09.011
- 219 **2.** Ho JW, Fernandez MM, Rebong RA, Carlson AN, Kim T, Afshari NA. Microbiological profiles  
220 of fungal keratitis: a 10-year study at a tertiary referral center. *J Ophthalmic Inflamm Infect*.  
221 2016;6(1):5. doi:10.1186/s12348-016-0071-6
- 222 **3.** Natamycin approved--first U.S. drug for fungal keratitis. *FDA Drug Bull*. 1978;8(6):37-38.
- 223 **4.** Prajna NV, Krishnan T, Rajaraman R, et al. Effect of Oral Voriconazole on Fungal Keratitis in  
224 the Mycotic Ulcer Treatment Trial II (MUTT II): A Randomized Clinical Trial. *JAMA Ophthalmol*.  
225 2016;134(12):1365-1372. doi:10.1001/jamaophthalmol.2016.4096
- 226 **5.** Prajna NV, Krishnan T, Mascarenhas J, et al. The Mycotic Ulcer Treatment Trial: A  
227 Randomized Trial Comparing Natamycin vs Voriconazole. *JAMA Ophthalmol*. 2013;131(4):422-  
228 429. doi:10.1001/jamaophthalmol.2013.1497
- 229 **6.** Ray KJ, Prajna NV, Lalitha P, et al. The Significance of Repeat Cultures in the Treatment of  
230 Severe Fungal Keratitis. *Am J Ophthalmol*. 2018;189:41-46. doi:10.1016/j.ajo.2018.02.003
- 231 **7.** Ray KJ, Lalitha P, Prajna NV, et al. The Utility of Repeat Culture in Fungal Corneal Ulcer  
232 Management: A Secondary Analysis of the MUTT-I Randomized Clinical Trial. *Am J*  
233 *Ophthalmol*. 2017;178:157-162. doi:10.1016/j.ajo.2017.03.032
- 234 **8.** Cho J, Prajna NV, Lalitha P, et al. Therapeutic Penetrating Keratoplasty Button Cultures in  
235 The Mycotic Ulcer Treatment Trial II: A Randomized Trial Comparing Oral Voriconazole Versus  
236 Placebo. *Am J Ophthalmol*. 2018;192:142-145. doi:10.1016/j.ajo.2018.05.007
- 237 **9.** Natamycin and Voriconazole Exhibit Synergistic Interactions with Nonantifungal Ophthalmic  
238 Agents against *Fusarium* Species Ocular Isolates | *Antimicrobial Agents and Chemotherapy*.  
239 Accessed July 10, 2020. <https://aac.asm.org/content/63/7/e02505-18.abstract>

- 240 **10.** Johnson MD, MacDougall C, Ostrosky-Zeichner L, Perfect JR, Rex JH. Combination  
241 Antifungal Therapy. *Antimicrob Agents Chemother.* 2004;48(3):693-715.  
242 doi:10.1128/AAC.48.3.693-715.2004
- 243 **11.** Taylor MRG. Pharmacogenetics of the human beta-adrenergic receptors.  
244 *Pharmacogenomics J.* 2007;7(1):29-37. doi:10.1038/sj.tpj.6500393
- 245 **12.** Filippi L, Cavallaro G, Berti E, et al. Study protocol: safety and efficacy of propranolol 0.2%  
246 eye drops in newborns with a precocious stage of retinopathy of prematurity (DROP-ROP-  
247 0.2%): a multicenter, open-label, single arm, phase II trial. *BMC Pediatr.* 2017;17(1):165.  
248 doi:10.1186/s12887-017-0923-8  
249
